# Supplementary material for: Simultaneous Amplicon Sequencing to Explore Co-Occurrence Patterns of Bacterial, Archaeal and Eukaryotic Microorganisms in Rumen Microbial Communities
Source: PubMed Central journal article supplement (PMC3568148; doi:10.1371/journal.pone.0047879), 2013-02-08

**Figure S4. Lengths of obtained sequencing reads for two different mixing ratios of the microbial groups analyzed.** Distribution of barcode mappable reads according to fragment length after quality control for the mixing ratios of 5:1:1:1 (open circles) and 5:1:1:0.2 (filled circles). The mixing ratios represent bacteria:archaea:ciliate protozoa:fungi.

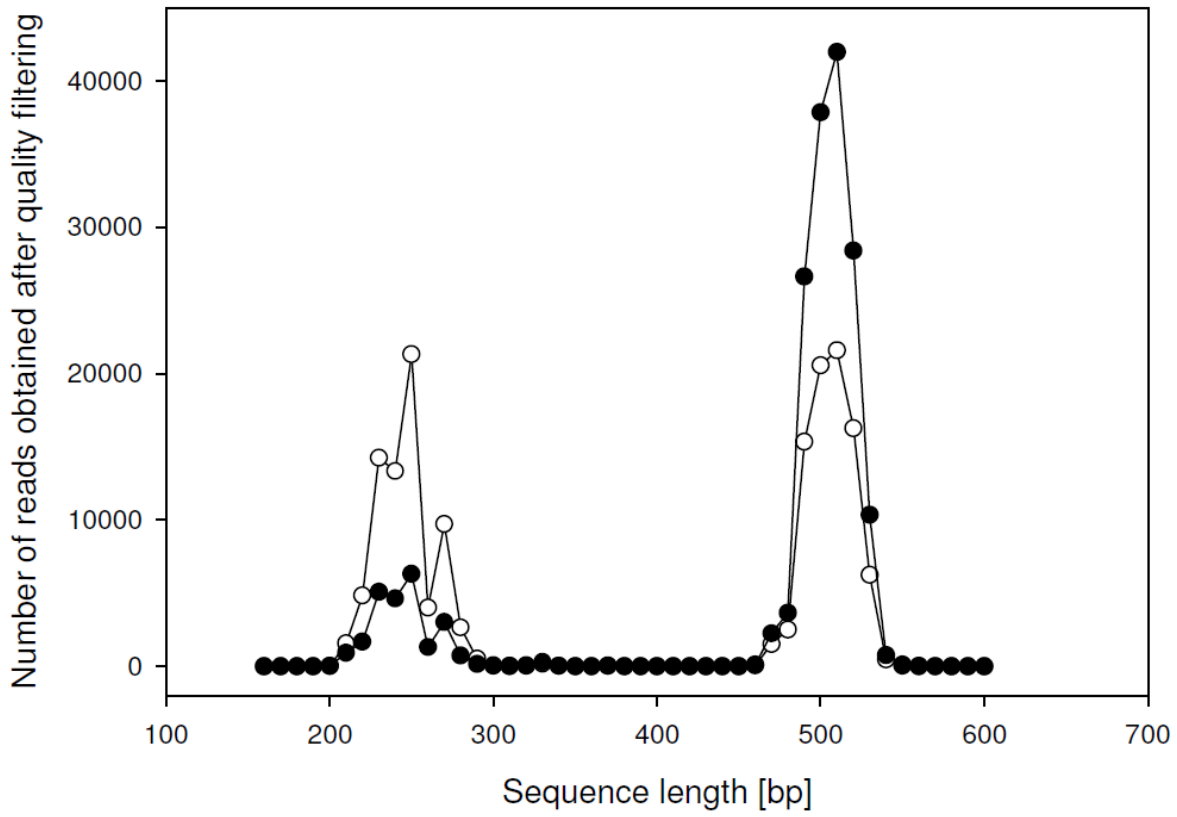

Supplement: pone.0047879.s004.pdf [file pone.0047879.s004.pdf]
