# Supplementary material for: Simultaneous Amplicon Sequencing to Explore Co-Occurrence Patterns of Bacterial, Archaeal and Eukaryotic Microorganisms in Rumen Microbial Communities
Source: PubMed Central journal article supplement (PMC3568148; doi:10.1371/journal.pone.0047879), 2013-02-08
Supplement: pone.0047879.s009.pdf [file pone.0047879.s009.pdf]

**Table S2. Ranges and averages of the numbers of phyla, classes, orders, and families detected across all DNA samples when using different primer sets targeting the Bacteria and Archaea.** Comparison of primer pairs targeting Bacteria (BaL, BaS, and ArBa) and methanogenic archaea (ArL, ArS, and ArBa) in regards to diversity at phylum-, class-, order-, and family-level.

|                 |      | BaL  | BaS  | ArBa | ArL | ArS | ArBa |
|-----------------|------|------|------|------|-----|-----|------|
| No. of phyla    | Min  | 6    | 6    | 7    | 1   | 1   | 1    |
|                 | Max  | 11   | 10   | 11   | 2   | 1   | 1    |
|                 | Mean | 8.8  | 8.6  | 9.1  | 1.8 | 1   | 1    |
| No. of classes  | Min  | 7    | 7    | 7    | 2   | 2   | 2    |
|                 | Max  | 12   | 12   | 12   | 4   | 3   | 3    |
|                 | Mean | 9.7  | 9.7  | 9.1  | 3.3 | 2.3 | 2.3  |
| No. of orders   | Min  | 7    | 7    | 7    | 2   | 2   | 2    |
|                 | Max  | 12   | 12   | 12   | 5   | 4   | 3    |
|                 | Mean | 9.5  | 9.8  | 8.9  | 3.8 | 2.5 | 2.3  |
| No. of families | Min  | 13   | 13   | 12   | 2   | 2   | 2    |
|                 | Max  | 18   | 19   | 18   | 5   | 4   | 3    |
|                 | Mean | 15.1 | 15.7 | 14.8 | 3.8 | 2.5 | 2.3  |
