# Supplementary material for: Simultaneous Amplicon Sequencing to Explore Co-Occurrence Patterns of Bacterial, Archaeal and Eukaryotic Microorganisms in Rumen Microbial Communities
Source: PubMed Central journal article supplement (PMC3568148; doi:10.1371/journal.pone.0047879), 2013-02-08
Supplement: pone.0047879.s010.pdf [file pone.0047879.s010.pdf]

**Table S3. Comparison of abundances of bacterial families detected by using 3 different primer sets (BaL, BaS, and ArBa) in all analyzed samples.** Comparison of primer pairs targeting Bacteria in regards to their coverage at family level. Families are ranked according to their abundances using primer pair BaL, and added up in that order for primer pairs BaS and ArBa to give a cumulative total (Sum).

| Phylum, Family                       | BaL  |           |      | BaS  |           |      | ArBa |           |      |
|--------------------------------------|------|-----------|------|------|-----------|------|------|-----------|------|
|                                      | Rank | Abundance | Sum  | Rank | Abundance | Sum  | Rank | Abundance | Sum  |
|                                      |      | [%]       | [%]  |      | [%]       | [%]  |      | [%]       | [%]  |
| <i>Firmicutes, Lachnospiraceae</i>   | 1    | 24.1      | 24.1 | 2    | 19.7      | 19.7 | 2    | 17.8      | 17.8 |
| <i>Bacteroidetes, Prevotellaceae</i> | 2    | 23.8      | 47.9 | 1    | 26.1      | 45.8 | 1    | 24.1      | 41.9 |
| <i>Bacteroidetes, Other</i>          | 3    | 14.3      | 62.2 | 3    | 13.8      | 59.6 | 3    | 12.9      | 54.8 |
| <i>Firmicutes, Other</i>             | 4    | 8.2       | 70.4 | 4    | 9.9       | 69.5 | 4    | 11.5      | 66.3 |
| <i>Firmicutes, Ruminococcaceae</i>   | 5    | 8.1       | 78.5 | 5    | 8.4       | 77.5 | 5    | 9.4       | 75.7 |
| <i>Fibrobacteraceae</i>              | 6    | 5.3       | 83.8 | 6    | 5.0       | 82.9 | 6    | 5.3       | 81.0 |
| <i>Cyanobacteria, Other</i>          | 7    | 1.7       | 85.5 | 10   | 1.5       | 84.4 | 21   | 0.2       | 81.2 |

|                                                            |    |     |      |    |     |      |    |     |      |
|------------------------------------------------------------|----|-----|------|----|-----|------|----|-----|------|
| <i>Firmicutes, Veillonellaceae</i>                         | 8  | 1.5 | 87.0 | 7  | 2.3 | 86.7 | 8  | 3.3 | 84.5 |
| <i>Spirochaetaceae</i>                                     | 9  | 1.3 | 88.3 | 8  | 1.7 | 88.4 | 7  | 4.6 | 89.1 |
| <i>Firmicutes, Clostridiales</i><br>Family XIII.           | 10 | 1.3 | 89.6 | 21 | 0.4 | 88.8 | 9  | 1.3 | 90.4 |
| <i>Bacteroidetes,</i><br><i>Porphyromonadaceae</i>         | 11 | 1.3 | 90.9 | 9  | 1.6 | 90.4 | 10 | 1.2 | 91.6 |
| <i>Actinobacteria,</i><br><i>Coriobacteriaceae</i>         | 12 | 1.0 | 91.9 | 12 | 1.0 | 91.4 | 12 | 0.9 | 92.5 |
| <i>Tenericutes, Other</i>                                  | 13 | 1.0 | 92.9 | 13 | 0.9 | 92.3 | 13 | 0.8 | 93.3 |
| <i>Firmicutes,</i><br><i>Erysipelotrichaceae</i>           | 14 | 0.9 | 93.8 | 11 | 1.2 | 93.5 | 19 | 0.3 | 93.6 |
| <i>Proteobacteria, other</i><br><i>Alphaproteobacteria</i> | 15 | 0.7 | 94.5 | 14 | 0.9 | 94.4 | 18 | 0.4 | 94.0 |
| SR1, Other                                                 | 16 | 0.7 | 95.2 | 15 | 0.7 | 95.1 | 11 | 1.0 | 95.0 |
| <i>Tenericutes,</i><br><i>Anaeroplasmataceae</i>           | 17 | 0.6 | 95.8 | 16 | 0.6 | 95.7 | 17 | 0.4 | 95.4 |
| <i>Tenericutes, vadinHA31</i>                              | 18 | 0.5 | 96.3 | 18 | 0.5 | 96.2 | 22 | 0.1 | 95.5 |

|                                               |    |     |      |    |     |      |    |     |      |
|-----------------------------------------------|----|-----|------|----|-----|------|----|-----|------|
| <i>Firmicutes,</i><br><i>Catabacteriaceae</i> | 19 | 0.4 | 96.7 | 17 | 0.6 | 96.8 | 15 | 0.6 | 96.1 |
| TM7, F16                                      | 20 | 0.4 | 97.1 | 20 | 0.4 | 97.2 | 23 | 0.1 | 96.2 |
| <i>Chloroflexi, Anaerolinaceae</i>            | 21 | 0.3 | 97.4 | 23 | 0.0 | 97.2 | 20 | 0.3 | 96.5 |
| <i>Cyanobacteriaceae, Other</i>               | 22 | 0.3 | 97.7 | 19 | 0.4 | 97.6 | 16 | 0.5 | 97.0 |
| <i>Verrucomicrobia, Other</i>                 | 23 | 0.3 | 98.0 | 22 | 0.3 | 97.9 | 14 | 0.7 | 97.7 |
