# Supplementary material for: Simultaneous Amplicon Sequencing to Explore Co-Occurrence Patterns of Bacterial, Archaeal and Eukaryotic Microorganisms in Rumen Microbial Communities
Source: PubMed Central journal article supplement (PMC3568148; doi:10.1371/journal.pone.0047879), 2013-02-08
Supplement: pone.0047879.s011.pdf [file pone.0047879.s011.pdf]

10 **Table S4. Comparison of abundances of archaeal clades detected using 3 different primer sets (ArL, ArS, and ArBa) in all**  
 11 **analyzed samples.** Comparison of primer pairs targeting methanogenic archaea in regards to their coverage of major clades. Clades are  
 12 ranked according to their abundances using primer pair ArL and added up in that order for primer pairs ArS and ArBa to give a  
 13 cumulative total (Sum). *Mbb.* = *Methanobrevibacter*.

| Clade                     | ArL  |           |      | ArS  |           |      | ArBa |           |      |
|---------------------------|------|-----------|------|------|-----------|------|------|-----------|------|
|                           | Rank | Abundance | Sum  | Rank | Abundance | Sum  | Rank | Abundance | Sum  |
|                           |      | [%]       | [%]  |      | [%]       | [%]  |      | [%]       | [%]  |
| <i>Mbb. ruminantium</i>   | 1    | 37.2      | 37.2 | 1    | 36.0      | 36.0 | 2    | 33.2      | 33.2 |
| <i>Mbb. gottschalkii</i>  | 2    | 34.0      | 71.2 | 2    | 35.2      | 71.2 | 1    | 43.6      | 76.8 |
| Rumen Cluster C           | 3    | 17.6      | 88.8 | 4    | 11.2      | 82.4 | 4    | 6.2       | 83.0 |
| <i>Methanosphaera</i>     | 4    | 9.8       | 98.6 | 3    | 16.9      | 99.3 | 3    | 15.6      | 98.6 |
| <i>Methanosarcina</i>     | 5    | 1.0       | 99.6 | 8    | 0.11      | 99.4 | 8    | 0.07      | 98.7 |
| <i>Mbb. smithii</i>       | 6    | 0.14      | 99.7 | -    | -         | 99.4 | -    | -         | 98.7 |
| <i>Sulfolobus</i>         | 7    | 0.12      | 99.8 | -    | -         | 99.4 | -    | -         | 98.7 |
| <i>Methanobacterium</i>   | 8    | 0.12      | 99.9 | 5    | 0.17      | 99.6 | 6    | 0.15      | 98.8 |
| <i>Methanimicrococcus</i> | 9    | 0.11      | 100  | 6    | 0.16      | 99.7 | 7    | 0.11      | 98.9 |
| <i>Methanocorpusculum</i> | 10   | 0.03      | 100  | -    | -         | 99.7 | -    | -         | 98.9 |

|                          |    |      |     |    |       |      |   |     |      |
|--------------------------|----|------|-----|----|-------|------|---|-----|------|
| <i>Methanomicrobium</i>  | 11 | 0.02 | 100 | 11 | 0.01  | 99.8 | - | -   | 98.9 |
| <i>Mbb. wollinii</i>     | 12 | 0.01 | 100 | 9  | 0.04  | 99.8 | - | -   | 98.9 |
| <i>Mbb. arboriphilus</i> | -  | -    | 100 | 7  | 0.13  | 99.9 | 5 | 1.1 | 100  |
| <i>Mbb. woesii</i>       | -  | -    | 100 | 10 | 0.02  | 99.9 | - | -   | 100  |
| <i>Methanoculleus</i>    | -  | -    | 100 | 12 | 0.001 | 99.9 | - | -   | 100  |
